# Supplementary material
Source: PubMed Central journal article supplement (PMC5460826)

**Table S1**

Top 50 gene up regulated in GH tumors vs Normal

Top 50 gene down regulated in GH tumors vs Normal

| Gene       | p value  | Fold change |
|------------|----------|-------------|
| GPAM       | 5.80E-20 | 13.3261     |
| SLC38A4    | 4.54E-12 | 11.0708     |
| CRTAC1     | 2.49E-10 | 9.15098     |
| ANLN       | 5.52E-13 | 8.56572     |
| MIR7-3     | 2.80E-13 | 7.8148      |
| NOX4       | 7.55E-08 | 7.42519     |
| UIMC1      | 1.30E-11 | 6.58914     |
| MIR27B     | 3.29E-19 | 6.21656     |
| ADAMTSL1   | 3.46E-09 | 5.34361     |
| RFC1       | 6.83E-10 | 5.27605     |
| CBLN1      | 1.96E-05 | 4.75386     |
| MIR15A     | 1.82E-15 | 4.74236     |
| ST8SIA4    | 2.22E-13 | 4.46439     |
| AK5        | 2.04E-06 | 4.34198     |
| HEPACAM2   | 2.58E-06 | 4.18596     |
| DBC1       | 2.12E-07 | 4.14127     |
| CHN2       | 1.48E-07 | 4.14068     |
| GALNT5     | 3.56E-07 | 4.07638     |
| PLXDC1     | 1.02E-12 | 3.94474     |
| LOC121952  | 6.97E-14 | 3.90895     |
| HIGD1B     | 2.29E-16 | 3.74049     |
| ENPP2      | 1.01E-05 | 3.64975     |
| CLSTN2     | 2.43E-07 | 3.64525     |
| MIR377     | 4.32E-11 | 3.58193     |
| CASP12     | 5.56E-11 | 3.57105     |
| CHRN4      | 9.57E-10 | 3.48619     |
| RTKN2      | 2.59E-10 | 3.47283     |
| CPVL       | 7.66E-08 | 3.43645     |
| MIR30E     | 1.82E-17 | 3.42594     |
| RGS5       | 8.94E-09 | 3.39614     |
| CSGALNACT1 | 8.85E-07 | 3.38737     |
| MPEG1      | 6.11E-09 | 3.3507      |
| EPB41L4B   | 3.53E-12 | 3.2474      |
| MGAM       | 4.40E-05 | 3.17652     |
| TRHDE      | 0.001313 | 3.04665     |
| CSMD2      | 2.56E-07 | 3.04183     |
| TMEM74     | 5.99E-09 | 3.02501     |

| Gene     | p value  | Fold change |
|----------|----------|-------------|
| GAL      | 3.29E-18 | -80.1988    |
| LHB      | 1.77E-16 | -47.5177    |
| TSHB     | 1.29E-19 | -35.5375    |
| POMC     | 5.01E-12 | -32.6512    |
| CRYAB    | 1.31E-20 | -22.8318    |
| HP       | 2.22E-13 | -20.4309    |
| FSHB     | 3.15E-11 | -20.1862    |
| CHI3L1   | 1.69E-10 | -19.3164    |
| CALB1    | 1.08E-10 | -18.6909    |
| CGA      | 8.25E-08 | -18.4691    |
| GNRHR    | 7.42E-14 | -15.5598    |
| CGB1     | 2.83E-19 | -15.241     |
| SERPINF1 | 1.52E-12 | -15.2225    |
| ASCL1    | 6.07E-10 | -14.9497    |
| GPC4     | 1.77E-12 | -14.7413    |
| SLPI     | 1.74E-08 | -13.8382    |
| SERPINA3 | 1.04E-09 | -13.1348    |
| C7       | 7.84E-12 | -12.4811    |
| PMAIP1   | 6.34E-12 | -12.2092    |
| UGT2B7   | 4.10E-11 | -12.0647    |
| GPR50    | 4.44E-08 | -11.8763    |
| CGB2     | 1.74E-18 | -10.9285    |
| GPC3     | 1.37E-11 | -10.9052    |
| CP       | 3.27E-11 | -10.6246    |
| PCP4L1   | 5.73E-12 | -10.5934    |
| COL6A6   | 3.35E-14 | -10.5374    |
| C13orf36 | 3.75E-10 | -9.99283    |
| LRRTM4   | 3.24E-09 | -9.65104    |
| C4orf31  | 1.39E-07 | -9.47045    |
| UGT2A1   | 4.54E-12 | -9.12288    |
| SPON1    | 5.71E-07 | -9.06451    |
| BBOX1    | 2.06E-11 | -9.01745    |
| IGFBP5   | 2.17E-13 | -8.7876     |
| DGKK     | 1.53E-09 | -8.69226    |
| ADH1B    | 5.23E-16 | -8.50344    |
| TRPM3    | 2.50E-13 | -8.43492    |
| APOD     | 1.00E-11 | -8.36737    |

|           |          |         |
|-----------|----------|---------|
| GHSR      | 0.000939 | 3.00294 |
| ADAMTS14  | 7.47E-12 | 2.9632  |
| SHISA3    | 3.60E-05 | 2.96027 |
| CD36      | 6.42E-07 | 2.8166  |
| CPM       | 2.28E-05 | 2.79453 |
| CD79B     | 3.63E-05 | 2.7234  |
| MIR29C    | 8.66E-11 | 2.70766 |
| IGSF6     | 2.55E-07 | 2.66523 |
| TEKT1     | 1.77E-05 | 2.65244 |
| KLB       | 2.83E-06 | 2.64889 |
| LOC643923 | 4.21E-06 | 2.63271 |
| MIR148B   | 5.56E-12 | 2.62505 |
| MSL3L2    | 1.03E-07 | 2.59965 |

|         |          |          |
|---------|----------|----------|
| ESR1    | 3.73E-12 | -8.34413 |
| RGS4    | 6.03E-09 | -8.31069 |
| GJA1    | 2.12E-14 | -8.17594 |
| CGB5    | 1.74E-17 | -8.16953 |
| GPM6B   | 5.29E-15 | -8.09007 |
| SDC4    | 2.32E-11 | -8.08978 |
| CLDN7   | 1.59E-12 | -7.97997 |
| SFRP2   | 1.41E-15 | -7.95603 |
| AVPR1B  | 4.23E-11 | -7.55165 |
| CGB7    | 1.05E-16 | -7.53039 |
| C2orf40 | 7.20E-09 | -7.39104 |
| AREG    | 1.79E-13 | -7.35144 |
| CA8     | 4.87E-08 | -7.34695 |

**Table S2**

Top 50 gene up regulated in SG vs DG tumors

| Gene     | p value  | Fold change |
|----------|----------|-------------|
| CADM2    | 4.38E-10 | 21.3069     |
| SLC38A4  | 1.40E-09 | 16.4691     |
| SLC24A2  | 2.27E-08 | 12.7889     |
| SGCZ     | 1.90E-07 | 12.7609     |
| SEMA3A   | 1.62E-06 | 10.9913     |
| LGR5     | 0.000478 | 10.9466     |
| SYT10    | 4.61E-06 | 10.4307     |
| CLVS2    | 2.88E-06 | 10.3803     |
| VAT1L    | 2.81E-06 | 10.0126     |
| KCNH7    | 8.77E-07 | 9.26894     |
| ABI3BP   | 3.86E-07 | 9.25909     |
| SLC38A3  | 1.01E-07 | 8.91477     |
| KCNQ5    | 7.40E-05 | 8.5181      |
| NTNG1    | 3.24E-09 | 8.08567     |
| GPR64    | 5.57E-08 | 8.0635      |
| MGAM     | 3.11E-07 | 7.80602     |
| CASP12   | 2.68E-13 | 7.56974     |
| NTS      | 0.007513 | 7.56484     |
| KLB      | 5.88E-11 | 7.42316     |
| HAL      | 2.15E-08 | 7.41204     |
| SV2C     | 0.000477 | 7.4118      |
| ADAMTS14 | 1.32E-16 | 6.96187     |
| RFTN1    | 7.11E-13 | 6.95117     |
| MFAP4    | 2.03E-07 | 6.71927     |
| EDIL3    | 0.007432 | 6.68923     |
| SHISA3   | 6.90E-07 | 6.29855     |
| GNG8     | 7.25E-13 | 6.23557     |
| PRDM8    | 5.05E-07 | 6.12209     |
| NUAK1    | 7.19E-13 | 6.04126     |
| SLCO5A1  | 1.52E-05 | 5.90812     |
| RYR2     | 0.000987 | 5.86323     |
| PREX2    | 1.36E-07 | 5.69319     |
| SPOCK3   | 0.003537 | 5.61549     |
| C5orf23  | 5.65E-05 | 5.50437     |
| FAM19A2  | 9.35E-05 | 5.39674     |
| TIAM1    | 5.07E-06 | 5.19031     |
| SLC47A1  | 0.000132 | 5.18485     |

Top 50 gene down regulated in SG vs DG tumors

| Gene     | p value  | Fold change |
|----------|----------|-------------|
| ESRP1    | 1.01E-11 | -20.145     |
| LMO3     | 2.63E-05 | -18.5692    |
| CGA      | 0.000211 | -14.2351    |
| GPR98    | 1.94E-13 | -12.0741    |
| TRIM36   | 5.97E-08 | -11.2978    |
| CDH1     | 9.73E-09 | -10.432     |
| TMEM30B  | 1.49E-14 | -10.3659    |
| AP1M2    | 6.13E-14 | -10.2069    |
| MAOB     | 1.61E-08 | -9.89205    |
| CCND2    | 2.03E-09 | -9.45764    |
| TRHDE    | 6.95E-06 | -9.15629    |
| ACVR1C   | 7.64E-10 | -9.09927    |
| AKR1B10  | 1.57E-07 | -9.02909    |
| FBXO16   | 7.30E-10 | -8.96672    |
| RHOBTB3  | 5.08E-11 | -8.66724    |
| NKX2-2   | 6.79E-12 | -8.57978    |
| CHML     | 2.18E-12 | -8.06082    |
| VEPH1    | 4.70E-06 | -8.00923    |
| IL13RA2  | 0.000256 | -7.88582    |
| EFEMP1   | 4.19E-06 | -7.8754     |
| GAD1     | 3.15E-06 | -7.45941    |
| NR5A1    | 1.28E-06 | -7.33888    |
| PCK1     | 6.09E-06 | -7.08649    |
| ARHGEF38 | 1.04E-05 | -6.99914    |
| DCX      | 8.70E-10 | -6.64124    |
| HTR4     | 6.83E-07 | -6.60994    |
| MUM1L1   | 0.000165 | -6.46479    |
| TAGLN3   | 5.19E-06 | -6.34963    |
| OPN3     | 1.06E-09 | -6.14448    |
| RAB25    | 3.03E-07 | -6.11629    |
| KCNN2    | 8.40E-09 | -5.96298    |
| OR7C1    | 1.30E-05 | -5.87505    |
| PERP     | 6.87E-14 | -5.87197    |
| TMEM45B  | 4.08E-05 | -5.66893    |
| GJB7     | 5.40E-05 | -5.64009    |
| ST14     | 7.40E-11 | -5.57676    |
| TNR      | 5.57E-05 | -5.52281    |

|         |          |         |
|---------|----------|---------|
| ODZ3    | 3.14E-05 | 5.1815  |
| CDH20   | 2.03E-05 | 5.15039 |
| TTN     | 3.05E-05 | 5.0075  |
| NRG3    | 6.56E-06 | 4.97905 |
| LRRTM3  | 0.008887 | 4.83838 |
| GBP2    | 7.67E-09 | 4.80446 |
| SLC17A9 | 1.22E-15 | 4.75073 |
| ANTXR2  | 8.79E-06 | 4.68765 |
| ACCN1   | 4.29E-08 | 4.57425 |
| NPR3    | 4.36E-05 | 4.51931 |
| PPAP2B  | 9.84E-07 | 4.49604 |
| ANLN    | 4.48E-05 | 4.4886  |
| SHISA9  | 0.000117 | 4.45559 |

|        |          |          |
|--------|----------|----------|
| CA12   | 6.65E-05 | -5.51633 |
| CHMP4C | 1.10E-11 | -5.45425 |
| LANCL3 | 7.80E-05 | -5.40168 |
| MYO3B  | 1.18E-06 | -5.3692  |
| RNF182 | 2.60E-05 | -5.35039 |
| PLD5   | 1.62E-05 | -5.21593 |
| CDKL5  | 5.32E-11 | -5.19661 |
| MT1F   | 6.28E-06 | -5.06908 |
| FABP6  | 4.14E-06 | -4.94744 |
| NNAT   | 0.000273 | -4.91038 |
| ZFHX4  | 2.59E-06 | -4.89413 |
| KRT23  | 4.80E-08 | -4.83577 |
| SPINT1 | 6.32E-12 | -4.79064 |

# Fig S1

| <b>Top IPA canonical pathways<br/>Norm vs GH tumor</b> |            |
|--------------------------------------------------------|------------|
| Pathway                                                | P-value    |
| Endothelin-1 Signaling                                 | 3.58 E -06 |
| cAMP-mediated signaling                                | 8.87 E -06 |
| G-Protein Coupled Receptor Signaling                   | 1.05 E -05 |
| Molecular Mechanisms of Cancer                         | 2.21 E -05 |
| Cell Junction Signaling                                | 2.27 E -05 |

| <b>Top IPA canonical pathways<br/>DG vs SG tumor</b> |            |
|------------------------------------------------------|------------|
| Pathway                                              | P-value    |
| Hepatic Fibrosis activation                          | 2.23 E -09 |
| Aryl Hydrocarbon Receptor Signaling                  | 5.77 E -05 |
| Endocytosis signaling                                | 1.15 E -03 |
| Wnt/Ca+ pathway                                      | 1.44 E -03 |
| Protein Kinase A Signaling                           | 1.83 E -03 |

# Fig S2

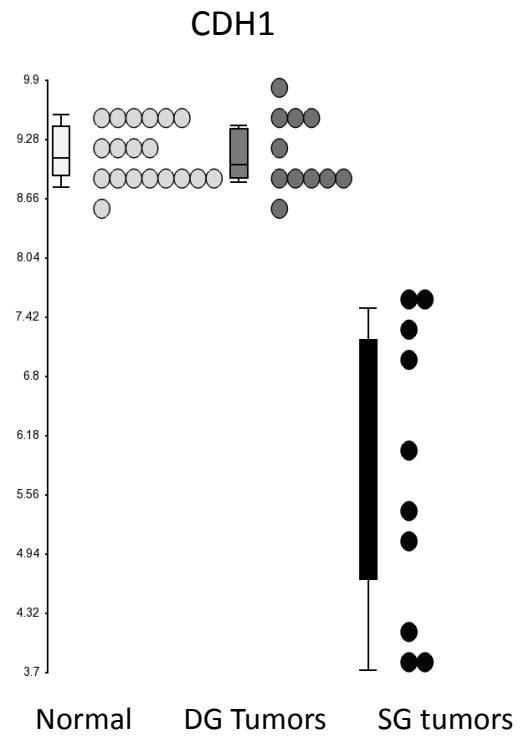

# Fig S3

| Genes up regulated in EMT | Fold change SG vs DG |
|---------------------------|----------------------|
| MMP2                      | 1.7                  |
| NRP1                      | 1.6                  |
| PPAP2B                    | 4.5                  |
| PRKCA                     | 1.7                  |
| VCAN                      | 1.7                  |
| EMP3                      | 2.3                  |
| IL1R1                     | 3.7                  |
| LTBP1                     | 1.7                  |
| MME                       | 1.6                  |
| SULF1                     | 2.1                  |
| ZEB1                      | 1.7                  |
| LOX                       | 2                    |
| ABCA1                     | 1.9                  |
| C5ORF13                   | 1.6                  |
| RGS4                      | 1.8                  |

| Genes down regulated in EMT | Fold change SG vs DG |
|-----------------------------|----------------------|
| CDH1                        | -10.4                |
| CXADR                       | -1.9                 |
| EPCAM                       | -2.4                 |
| PLXNB1                      | -1.5                 |
| SYK                         | -1.6                 |
| LSR                         | -2.6                 |
| MAP7                        | -2.2                 |
| OCLN                        | -2.4                 |
| PKP2                        | -2.9                 |
| SPINT1                      | -4.8                 |
| GPX3                        | -2.2                 |
| SLC27A2                     | -2.4                 |
| SORL1                       | 1.9                  |
| CDS1                        | -1.6                 |
| PLS1                        | -2                   |
| RHOD                        | -1.9                 |
| SLPI                        | -1.9                 |
| TMEM30B                     | -10.4                |
| TPD52L1                     | -1.8                 |
| TSPAN1                      | -3                   |
| ZNF165                      | -1.8                 |

# Fig S4

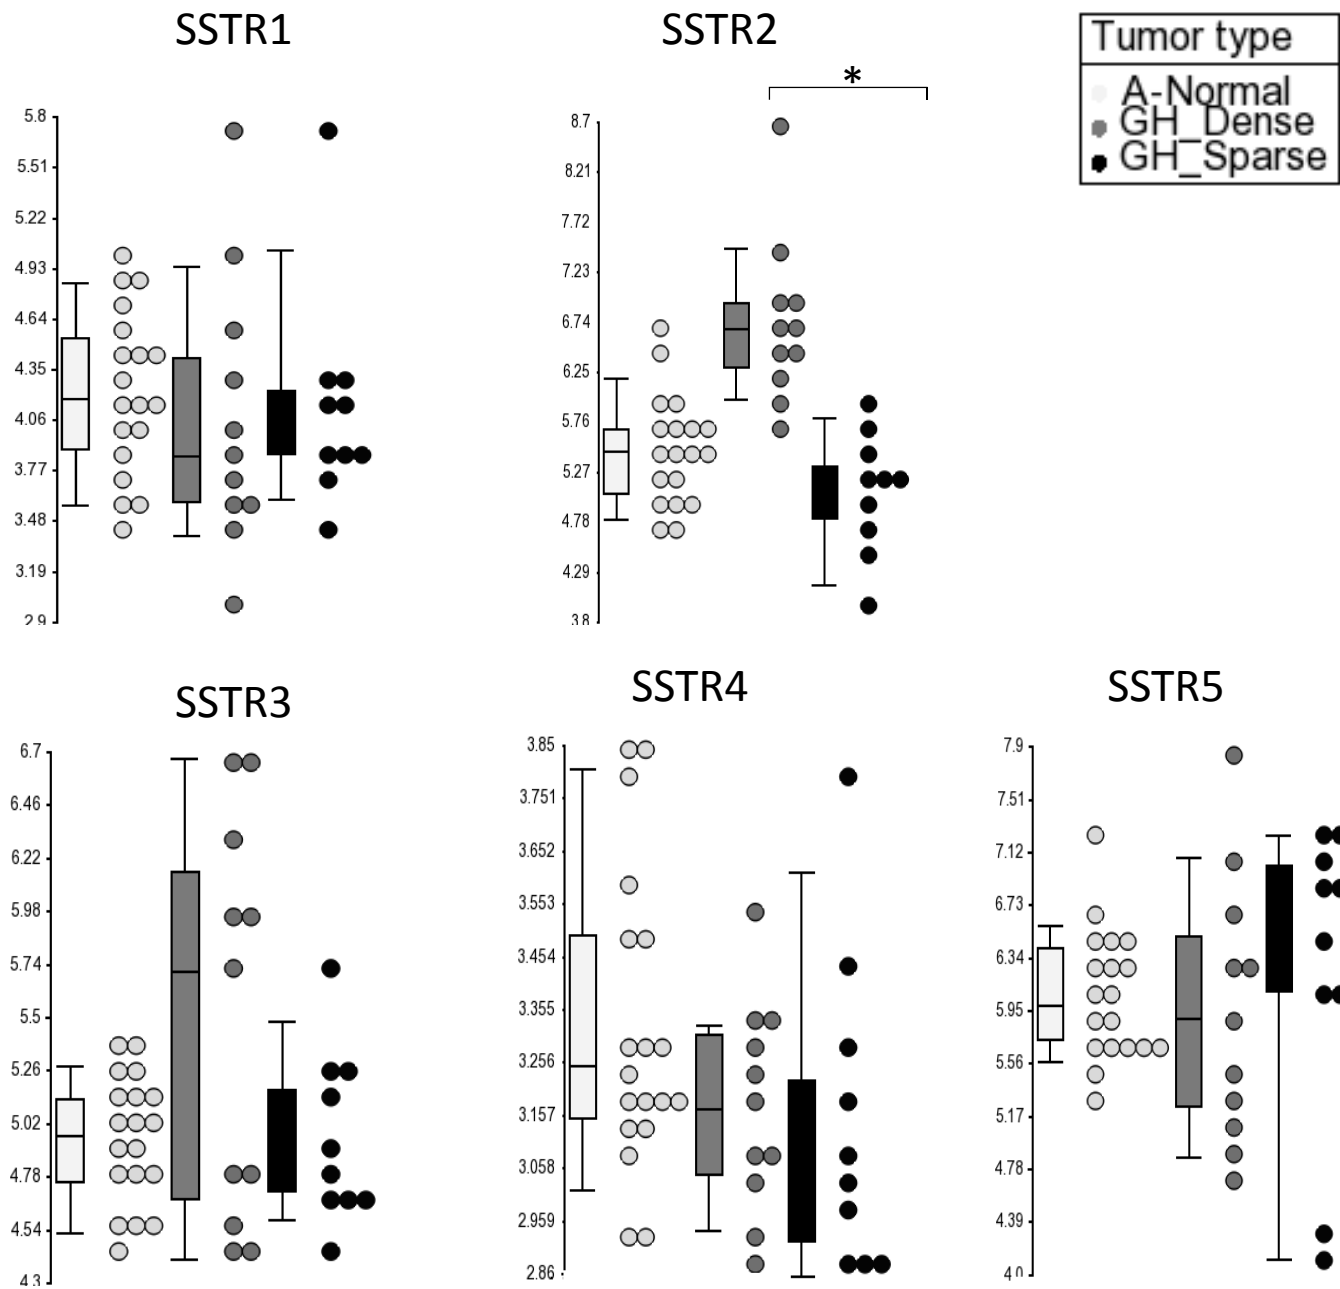



Fig S5

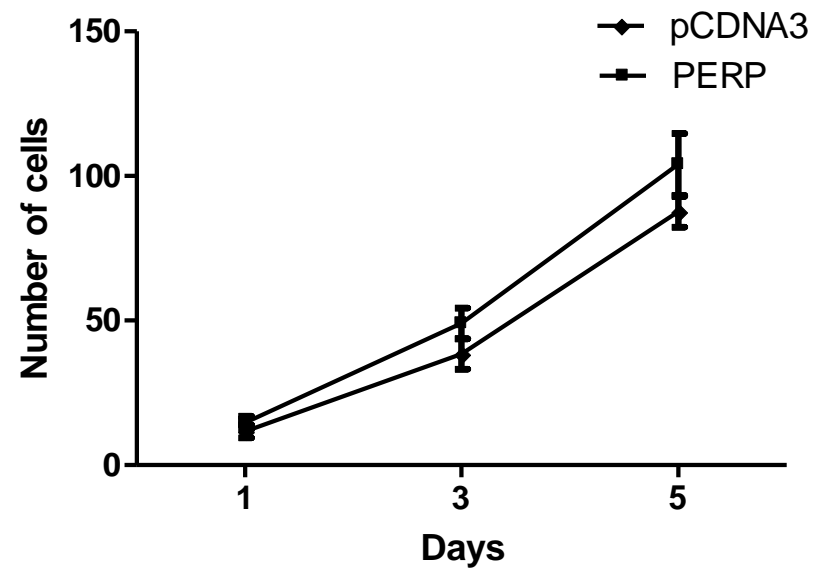

Supplement: en.2016-1841.sf1.pdf [file en.2016-1841.sf1.pdf]
